# Supplementary material for: Biogeochemical processes captured by carbon isotopes in redox-stratified water columns: a comparative study of four modern stratified lakes along an alkalinity gradient
Source: Copernicus journal article supplement (doi:10.5194/bg-20-2347-2023), 2023-06-21
Supplement: Supplementary file 1 [file bg-20-2347-2023-supplement.pdf]

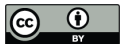

*Supplement of*

**Biogeochemical processes captured by carbon isotopes in redox-stratified water columns: a comparative study of four modern stratified lakes along an alkalinity gradient**

**Robin Havas et al.**

*Correspondence to:* Robin Havas (robin.havas@gmail.com)

The copyright of individual parts of the supplement might differ from the article licence.

# Supplementary Text

## *I. Offset between O<sub>2</sub> exhaustion and ORP decrease*

In lakes Alberca and Alchichica, there is a large offset between the depth where O<sub>2</sub> reaches ~0 and that where the oxidation reduction potential (ORP) starts to decrease (~7 and 10m differences, respectively). In lakes La Preciosa and Atexcac, this difference is less important (< 2m). Two possibilities could explain this discrepancy. First, we notice that the ORP usually starts decreasing after a turbidity peak appeared, likely corresponding to Mn-oxides precipitation (cf. Fig. 2). It is possible that the ORP signal is buffered to high values by the presence/formation of such oxidized species despite the absence of O<sub>2</sub>, and that until the probe meets important dissolved reduced species. Second, in lakes Alchichica, La Preciosa and Alberca, we see the decrease of ORP is more closely associated with the end of Chl a and/or phycocyanin peaks. This suggests that there may be a local production of dissolved oxygen still, but it is quickly consumed (e.g. through respiration) and is thus not measured. Yet it would act as a buffer for the ORP signal until Chl a and/or phycocyanin disappear.

## *II. Calculation of equilibrium isotopic fractionation between DIC and solid carbonates*

Carbonate precipitation is associated with a temperature- and mineralogy-dependent isotopic fractionation such that bottom sediment carbonates indirectly record the lake DIC isotopic composition following:

$$\delta^{13}\text{C}_{\text{carb}} = \delta^{13}\text{C}_{\text{DIC}} + \Delta^{13}\text{C}_{\text{carb-DIC}}(\text{Temp.}, \text{R-CO}_3)$$

where  $\Delta^{13}\text{C}_{\text{carb-DIC}}$  is the isotopic fractionation between DIC and carbonate ('R-CO<sub>3</sub>' designating the influence of different carbonate mineralogy). Thus, calculating the initial isotopic composition of the DIC from which a bulk carbonate assemblage has precipitated from requires to know the proportion of the different carbonate phases. More precisely, we consider the isotopic fractionation with the carbonate ions (CO<sub>3</sub><sup>2-</sup><sub>(aq)</sub>) from which the carbonate minerals actually precipitate. A weighted average fractionation can be calculated such as:

$$\Delta_{\text{bulk\_carbonate-CO}_3} = \sum \Delta_{\text{i\_carb-CO}_3} * f_i$$

where  $f_i$  is the proportion of each carbonate phase and  $\Delta_{\text{i\_carb-CO}_3}$  the isotopic fractionation between each of these and the CO<sub>3</sub><sup>2-</sup><sub>(aq)</sub>. The sediments mineralogical assemblages were determined by XRD (see main text for method). In the four Mexican lake sediments, the carbonate mix is composed of aragonite mainly, with minor calcite and/or hydromagnesite. Considering an annual average temperature of 16 °C, the isotopic fractionation ( $\Delta_{\text{i\_carb-CO}_3}$ ) linked to the precipitation of these phases equals to 1.0, -0.8 and 3.5 ‰, respectively. References for the equations used in the calculations are shown in Table S5.

Looking at the first most recent layer of sediments in each lake, we find the isotopic composition of the DIC in equilibrium with the carbonates ( $\delta^{13}\text{C}_{\text{CO}_3\text{-eq}}$ ) to be 3.1, 1.7, 1.7 and -0.8 ‰ in lakes Alchichica, Atexcac, La Preciosa

35 and Alberca, respectively (Table S5). This  $\delta^{13}\text{C}_{\text{CO}_3\text{-eq}}$  can then be compared with  $\delta^{13}\text{C}_{\text{CO}_3}$  of the lakes water column,  
 36 whose method of calculation can be found below in the supplementary part II. In lakes Alchichica, La Preciosa  
 37 and Alberca,  $\delta^{13}\text{C}_{\text{CO}_3\text{-eq}}$  corresponds to a  $\delta^{13}\text{C}_{\text{CO}_3}$  value of the water column and more precisely, to the top of their  
 38 oxycline/thermocline, i.e. before oxygen and temperature start to decrease (Tables S4 and S5). In lake Atexcac,  
 39  $\delta^{13}\text{C}_{\text{CO}_3\text{-eq}}$  is, within uncertainty, in equilibrium with  $\delta^{13}\text{C}_{\text{CO}_3}$ . This could be due to some detrital contributions from  
 40 microbialites with lower  $\delta^{13}\text{C}$  covering parts of the crater's walls (Fig. S1) to the sediments.

41

42 **III. Calculation of  $\delta^{13}\text{C}$  signatures from the different DIC species ( $\text{CO}_{2(\text{aq})}$ ,  $\text{HCO}_3^-$ ,  $\text{CO}_3^{2-}$ ) from the**  
 43 **bulk  $\delta^{13}\text{C}_{\text{DIC}}$**

44 The analytical method for DIC isotopes quantification allows to measure the bulk DIC isotopic composition (see  
 45 method in the main text), integrating the weighted average of  $\text{CO}_{2(\text{aq})}$ ,  $\text{HCO}_3^-$  and  $\text{CO}_3^{2-}$  respective isotopic  
 46 compositions such as:

47 
$$\delta^{13}\text{C}_{\text{DIC}} = ([\text{HCO}_3^-] * \delta^{13}\text{C}_{\text{HCO}_3} + [\text{CO}_3] * \delta^{13}\text{C}_{\text{CO}_3} + [\text{CO}_2] * \delta^{13}\text{C}_{\text{CO}_2}) / [\text{DIC}] , \quad (1)$$

48 However, strong isotopic fractionations of about 10 ‰ exist between the dissolved  $\text{CO}_{2(\text{aq})}$  and the two other DIC  
 49 species (e.g. Mook et al., 1974). At the pH of the studied Mexican lakes (~ 9),  $\text{CO}_{2(\text{aq})}$  represents less than 0.5 %  
 50 of total DIC (Table S4). Therefore, its isotopic composition significantly differs from that of the bulk DIC and  
 51 needs to be calculated *a posteriori* when considering processes involving  $\text{CO}_2$  specifically.

52 We can isolate and calculate  $\delta^{13}\text{C}_{\text{CO}_2}$  by using the isotopic fractionation between the different DIC species ( $\alpha_{\text{X-Y}}$ ).  
 53 The “per mil fractionation”  $1000 \ln \alpha_{\text{X-Y}}$  – when around 10 ‰ or less – is almost identical to the isotopic difference  
 54 between different species ( $\Delta^{13}\text{C}_{\text{X-Y}} = \delta^{13}\text{C}_{\text{X}} - \delta^{13}\text{C}_{\text{Y}}$ ) (Sharp, 2017). Therefore, we use  $\Delta^{13}\text{C}$  to derive Eq. (1) such  
 55 as:

56 
$$\delta^{13}\text{C}_{\text{CO}_2} = \delta^{13}\text{C}_{\text{DIC}} - ([\text{HCO}_3^-] * \Delta^{13}\text{C}_{\text{HCO}_3\text{-CO}_2} - [\text{CO}_3] * \Delta^{13}\text{C}_{\text{CO}_3\text{-CO}_2}) / [\text{DIC}] , \quad (2)$$

57 We used  $\Delta^{13}\text{C}$  data from Emrich et al. (1970) who provide isotopic fractionations between all three DIC species  
 58 as a function of temperature. All temperatures and resulting isotopic fractionations and compositions are  
 59 summarized in Table S5.

60

61 **IV. Chlorophyll a peak in the hypolimnion of Alberca de los Espinos**

62 In Alberca de los Espinos we recorded a peak of purported chlorophyll a (Chl. a) in the anoxic waters between 15  
 63 and 20 m in depth, reaching the same concentrations as in the upper oxygenated waters (Fig. 2). However, this  
 64 photosynthetic pigment is used as a proxy for oxygenic photosynthesis and thus not usually found in anoxic  
 65 conditions.

66 The occurrence of oxygenic organisms in anoxic waters could have several explanations: (i) the Chl. a peak  
 67 corresponds to a daily vertical migration of phytoplankton, (ii) the distribution of planktonic ecological niches  
 68 with depth is inherited from the mixing period and did not change despite seasonally implemented stratification of  
 69 the water column at the time of sampling or (iii) the Chl. a detected by the multi-parameter probe is mistaken with  
 70  
 71

72 another photosynthetic pigment, such as the bacteriochlorophyll of anaerobic microorganisms which have similar  
73 absorption and emission spectra (Taniguchi and Lindsey, 2021 and references therein).

74 The first two possibilities rely on the presence of cyanobacteria and/or eukaryotic algae under anoxic conditions  
75 either as “dormant” forms or active forms with a facultative anaerobic activity. A significant [DOC] increase at  
76 the same depth as this Chl. a peak suggests the presence of active organisms releasing DOC in the anoxic waters  
77 (~17 m, Fig. 3). Meanwhile, cyanobacteria can be specifically targeted by the phycocyanin pigment and are only  
78 found to match the Chl. a peak around 12-13 m (Fig. 2). Besides, unicellular eukaryotic algae do not perform  
79 anoxygenic photosynthesis (Atteia et al., 2013). Alternatively, aerobic unicellular photosynthetic eukaryotes  
80 forced to anoxic conditions can switch to fermentative metabolism (Atteia et al., 2013) which could participate to  
81 the DOC production observed at 17 m depth (Fig. 3). However, their presence in the anoxic waters despite more  
82 favorable conditions in shallower oxygenated waters of the lake where green algae thrive (Chl. a peak between 5  
83 and 10 m, Fig. 2) seems unlikely.

84 Moreover, anoxic waters of stratified water bodies are typical habitats of anoxygenic photosynthesizers such as  
85 green or purple sulfur bacteria (GSB and PSB, respectively) (e.g. Fulton et al., 2018). These organisms usually  
86 operate under deeper and darker conditions than oxygenic organisms and use photosynthetic pigments different  
87 than Chl. a. Namely, GSB synthesize bacteriochlorophyll (BChl.) c, d or e while PSB synthesize BChl. a as their  
88 main photosynthetic pigments (Fulton et al., 2018; Hamilton, 2019). Although the molecular composition of these  
89 pigments slightly differs from one another, some of them share close optical characteristics with Chl. a. Notably,  
90 BChl. c and d and Chl. a share B and Q bands of absorption at around 430 and 660 nm, respectively (see Table 1  
91 in Taniguchi and Lindsey, 2021). Meanwhile BChl. a bands are very distant from these values (~ 360 and 770  
92 nm). Furthermore, BChl. c, d and e and Chl. a also share very close fluorescence wavelengths around 670 nm while  
93 BChl. a reemits around 790 nm (Table 2 in Taniguchi and Lindsey, 2021). Since the multi-parameter probe that  
94 we used detects Chl. a based on these absorption and reemission wavelengths, it would likely confuse Chl. a with  
95 BChl. c and d (and possibly BChl. e) which are characteristic pigments of GSB. However, it should differentiate  
96 Chl. a and BChl. a (characteristic of PSB).

97 In conclusion, the third chlorophyll a peak in the anoxic waters of Lake Alberca could partly be the result of  
98 vertical migration of oxygenic photosynthetic organisms, but it more likely represents a bias of the probe towards  
99 bacteriochlorophylls pigments typical of green sulfur bacteria, reflecting the presence and activity of anoxygenic  
100 phototrophs at these depths.

101

## 102 V. *Calculation of the methane $\delta^{13}\text{C}$ endmember from the sediment porewaters of Lake Alberca de* 103 *los Espinos*

104 In Alberca de los Espinos, the isotopic composition of DIC strikingly increases from the middle of the lake water  
105 column to the first 10 cm of sediment porewaters (Table 2 and S4). This can be well explained by the action of  
106 acetoclastic methanogenesis which degrades sedimentary OM to produce  $^{13}\text{C}$ -depleted methane and  $^{13}\text{C}$ -rich  
107 carbon dioxide diffusing upward in the water column (main text part 5.2.4). Following the simplified equation

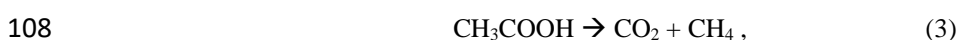

109 the C isotopic composition of methane ( $\delta^{13}\text{C}_{\text{CH}_4}$ ) can be calculated by mass balance based on C isotopic  
110 compositions of sedimentary OC and dissolved  $\text{CO}_2$  ( $\delta^{13}\text{C}_{\text{SOC}}$  and  $\delta^{13}\text{C}_{\text{CO}_2}$ , respectively) such that:

111 
$$\delta^{13}\text{C}_{\text{SOC}} = 0.5 * \delta^{13}\text{C}_{\text{CO}_2} + 0.5 * \delta^{13}\text{C}_{\text{CH}_4} , \quad (4)$$

112 and thus:

113 
$$\delta^{13}\text{C}_{\text{CH}_4} = 2 * \delta^{13}\text{C}_{\text{SOC}} - \delta^{13}\text{C}_{\text{CO}_2} . \quad (5)$$

114 Following Eq. (5), we calculate  $\delta^{13}\text{C}_{\text{CH}_4}$  at depth where  $\delta^{13}\text{C}_{\text{SOC}}$  and  $\delta^{13}\text{C}_{\text{CO}_2}$  are available, *i.e.* at 0.5 and 7 cm  
115 depths within the sediments of Lake Alberca (Table S4).

116 In this calculation, we consider that the isotopic composition of the sedimentary organic carbon that we measured  
117 corresponds to the one used by methanogen organisms. Moreover, we consider that the bulk isotopic composition  
118 of porewater DIC ( $\delta^{13}\text{C}_{\text{DIC}}$ ) is related to methanogenesis. This is supported by the fact that (i) the very positive  
119  $\delta^{13}\text{C}_{\text{DIC}}$  can unequivocally be explained by methanogenesis while differing from the water column  $\delta^{13}\text{C}_{\text{DIC}}$  and (ii)  
120 that the DIC concentration gradient between the porewater and the lake water forces the DIC to diffuse from the  
121 porewater to the lake water rather than the other way around. Nonetheless, we consider that there is isotopic  
122 exchange between the different DIC species of the porewater and lake water (as suggested by the diffusion of DIC  
123 through the porewaters and sediment-water interface). Hence, we use the calculated  $\delta^{13}\text{C}_{\text{CO}_2}$  value rather than bulk  
124  $\delta^{13}\text{C}_{\text{DIC}}$  in the calculation of Eq. (5).

125 Numerical derivation of Eq. (5) for depths 0.5 and 7 cm in the sediments are  $\delta^{13}\text{C}_{\text{CH}_4} = -59.0 \text{ ‰}$  and  $\delta^{13}\text{C}_{\text{CH}_4} = -$   
126  $57 \text{ ‰}$ , respectively.

127

128

# Supplementary Figures

129

130

## Alchichica

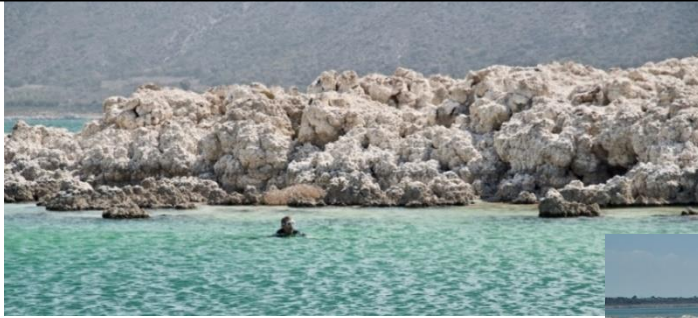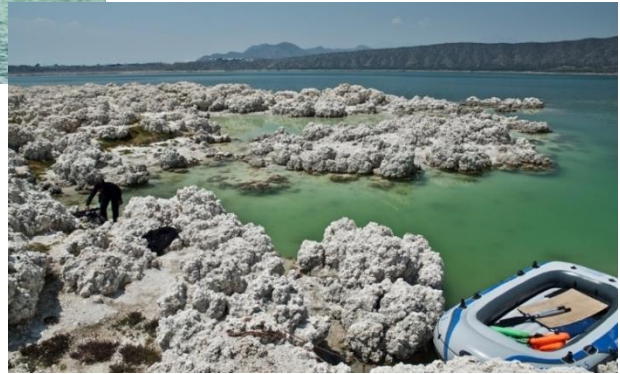

134

135

136

137

138

139

## Atexcac

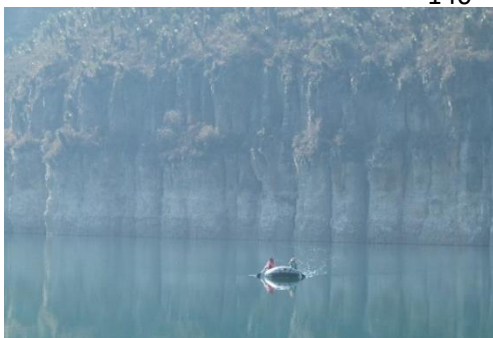

146

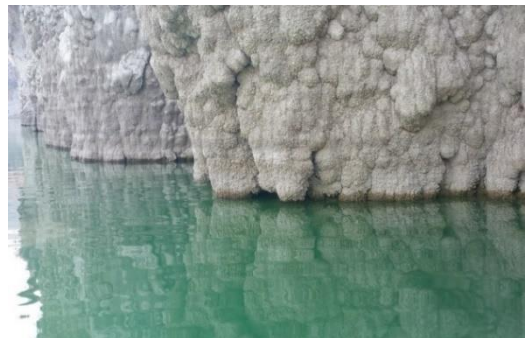

147

## La Preciosa

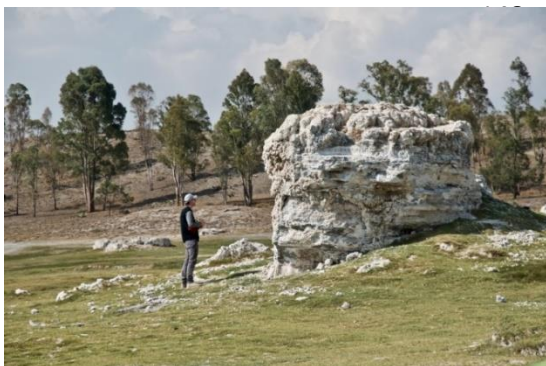

154

## Alberca de los Espinos

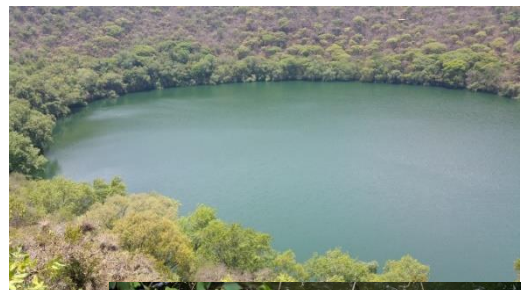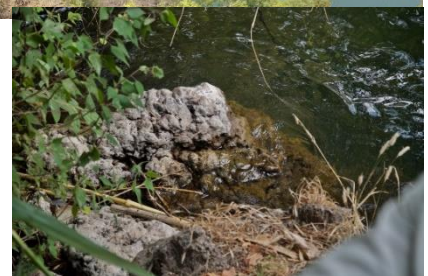

155

Figure S1. Photographs of the lakes showing different

156

elevation of emerged microbialites.

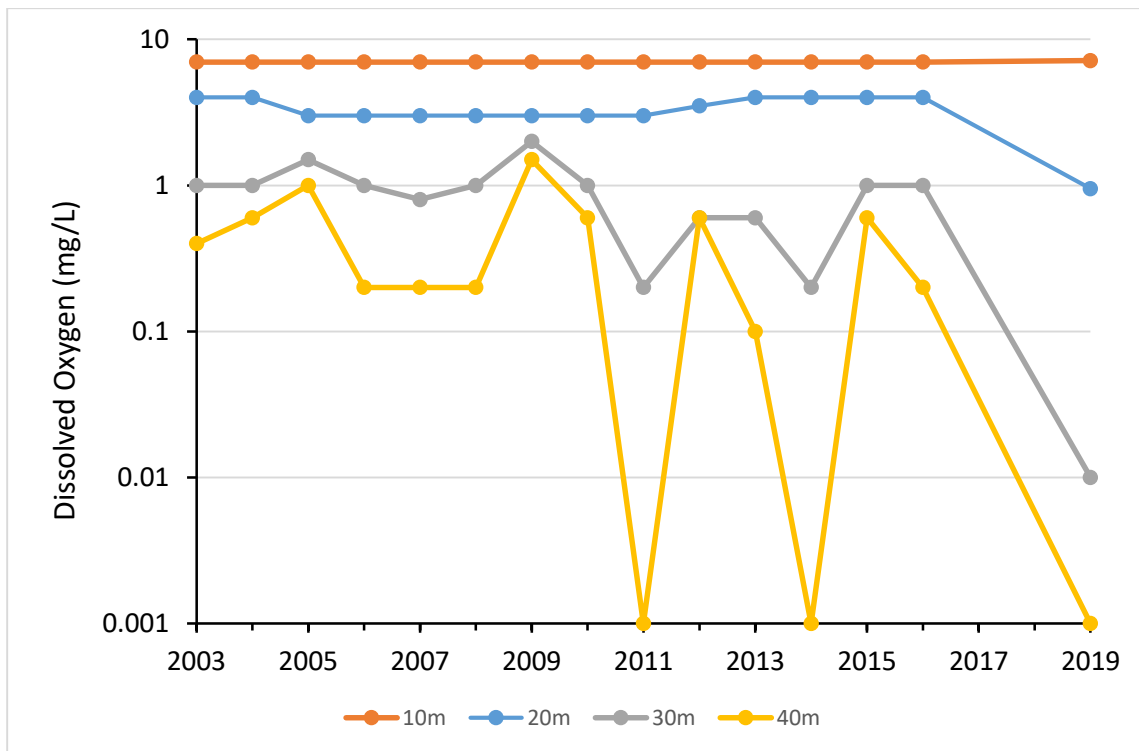

157

158 Figure S2. Dissolved oxygen (DO) concentrations in mg/L at 10, 20, 30 and 40m depth in lake  
 159 Alchichica in May since 2003. Data between 2003 and 2017 from Macek et al., 2020. We notice  
 160 that DO is lower in 2019 than other years at each depth pointing out the sharper stratification  
 161 of the lake in 2019.

162

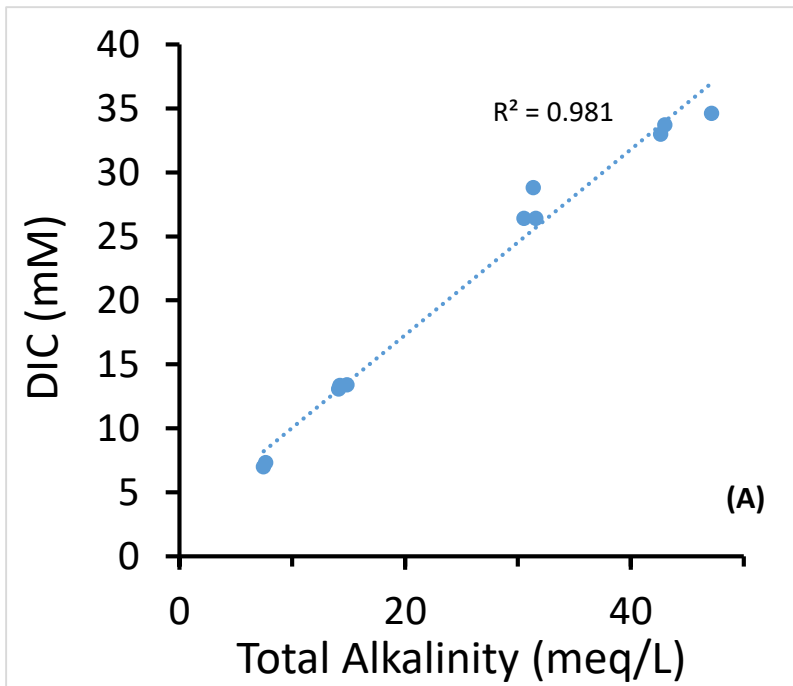

Figure S3:

Correlation between the total alkalinity of the four lakes in meq/L and their DIC concentration (A) and isotopic composition (B). Data from 2019 (this study) and 2012/2014 (Zeyen et al., 2021) are plotted in (A).

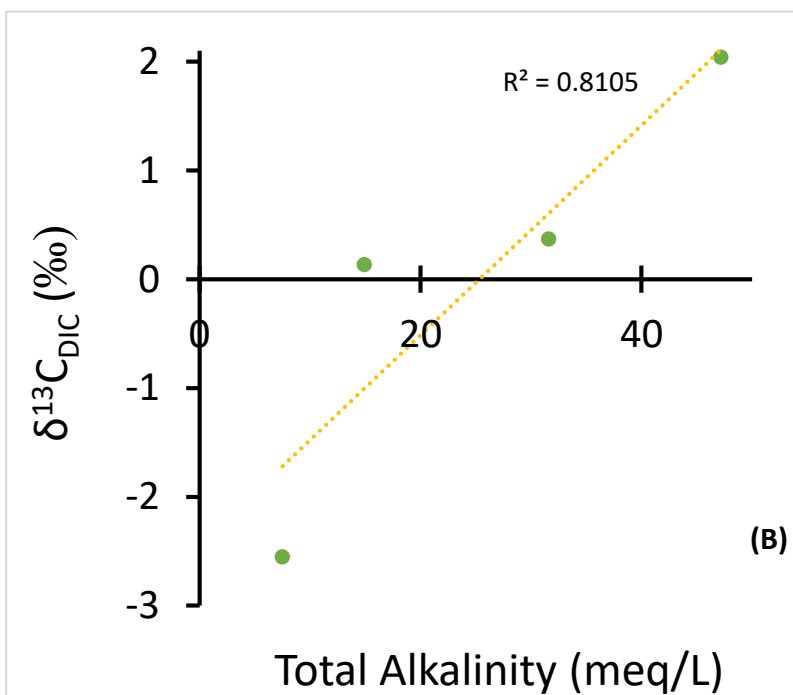



172

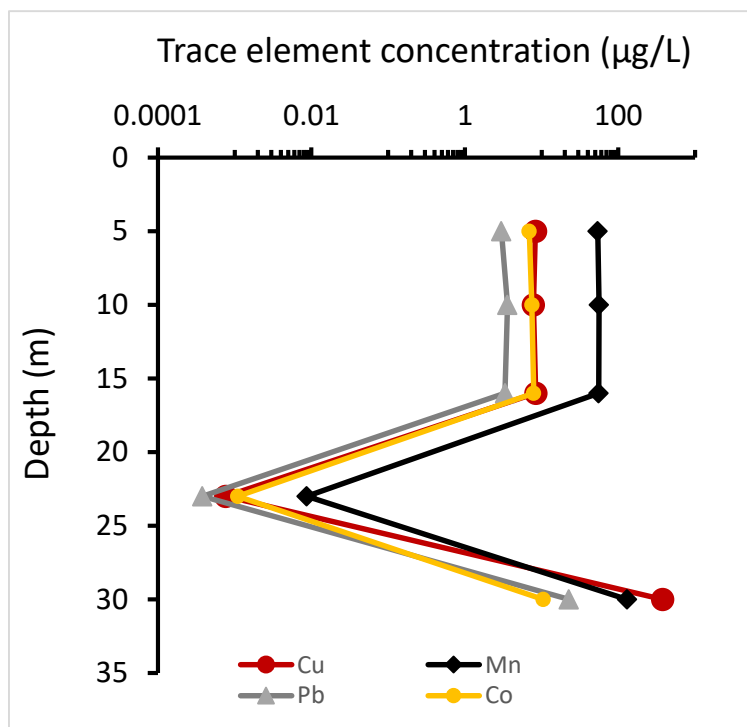

173

174 Figure S4. Depth profile of several metal ions dissolved in the waters of Lake Atexcac.

175

176

177

178

179

180

181

182

183

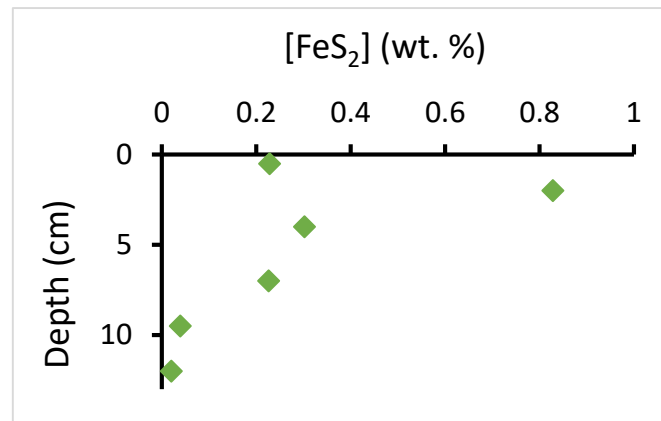

184 Figure S5. Pyrite concentrations in weight percent in the surficial sediments of Lake Alberca  
185 de los Espinos.

186

187 **Supplementary Tables**

188

189 Table S1

190 Concentrations and isotopic compositions of dissolved inorganic carbon (DIC) and particulate organic  
 191 carbon (POC) and C:N molar ratios of particulate organic matter (POM).

| Lake                       | Sample     | DIC    | POC  | (C:N) <sub>POM</sub> | $\delta^{13}\text{C}_{\text{DIC}}$ | $\delta^{13}\text{C}_{\text{POC}}$ |
|----------------------------|------------|--------|------|----------------------|------------------------------------|------------------------------------|
|                            |            | mmol/L |      | (molar)              | ‰                                  |                                    |
| Alchichica                 | AL 5m      | 35.0   | 0.07 | 10.6                 | 2.0                                | -26.7                              |
|                            | AL 10m     | 33.0   |      |                      | 2.0                                |                                    |
|                            | AL 20m     | 34.6   |      |                      | 1.6                                |                                    |
|                            | AL 30m     | 34.6   | 0.10 | 10.5                 | 1.7                                | -26.3                              |
|                            | AL 35m     | 34.9   | 0.02 | 8.1                  | 1.6                                | -25.7                              |
|                            | AL 40m     | 34.7   | 0.02 | 7.1                  | 1.6                                | -25.1                              |
|                            | AL 50m     | 34.8   |      |                      | 1.6                                |                                    |
|                            | AL 55m     | 34.8   | 0.01 | 5.9                  | 1.5                                | -24.1                              |
|                            | AL 58m     | 34.8   |      |                      | 1.6                                |                                    |
|                            | AL 60m     | 34.6   |      |                      | 1.5                                |                                    |
| Atexcac                    | ATX 5m     | 26.4   | 0.05 | 9.3                  | 0.4                                | -28.4                              |
|                            | ATX 10m    | 26.2   | 0.05 | 9.8                  | 0.4                                | -28.2                              |
|                            | ATX 16m    | 26.8   | 0.05 | 9.8                  | 0.3                                | -29.0                              |
|                            | ATX 23m    | 24.2   | 0.02 | 6.5                  | 0.9                                | -26.7                              |
|                            | ATX 30m    | 25.7   | 0.02 | 6.6                  | 0.2                                | -26.4                              |
| La Preciosa                | LP 5m      | 13.4   | 0.06 | 11.6                 | 0.1                                | -26.4                              |
|                            | LP 8m      |        | 0.07 | 10.4                 |                                    | -27.1                              |
|                            | LP 10m     | 13.4   | 0.06 | 12.2                 | 0.2                                | -27.4                              |
|                            | LP 12.5m   | 11.5   | 0.06 | 10.5                 | -0.2                               | -27.1                              |
|                            | LP 15m     | 13.4   | 0.03 | 8.2                  | -0.3                               | -23.5                              |
|                            | LP 20m     | 13.3   | 0.02 | 7.4                  | -0.4                               | -26.3                              |
|                            | LP 31m     | 13.3   | 0.02 | 7.3                  | -0.4                               | -25.2                              |
| Alberca de Los<br>Espinosa | Albosp 5m  | 6.8    | 0.04 | 8.5                  | -2.6                               | -27.0                              |
|                            | Albosp 7m  | 7.1    | 0.03 | 8.3                  | -2.3                               | -26.2                              |
|                            | Albosp 10m | 7.2    | 0.02 | 7.5                  | -4.1                               | -28.3                              |
|                            | Albosp 17m | 7.2    | 0.05 | 6.7                  | -3.4                               | -29.0                              |
|                            | Albosp 20m | 7.9    | 0.05 | 6.3                  | -3.3                               | -26.5                              |
|                            | Albosp 25m | 8.7    | 0.06 | 6.5                  | -2.0                               | -25.7                              |

192

193 Table S2  
 194 Calculated activities of the different dissolved inorganic carbon species, CO<sub>2</sub> partial pressure (P<sub>CO<sub>2</sub></sub>),  
 195 ratio of P<sub>CO<sub>2</sub></sub> with atmospheric P<sub>CO<sub>2</sub></sub> at 2320m altitude and pH presented for waters at different depths in  
 196 2019 and surface waters of years 2012 and 2014 (calculated with data from Zeyen et al., 2019).

| Lake                      | Sample         | $a(\text{CO}_{2(aq)})$ | $a(\text{HCO}_3^-)$ | $a(\text{CO}_3^{2-})$ | PCO <sub>2</sub> | PCO <sub>2</sub> /<br>PCO <sub>2-atm</sub> | pH   |
|---------------------------|----------------|------------------------|---------------------|-----------------------|------------------|--------------------------------------------|------|
|                           |                | LOG10                  |                     |                       | LOG10<br>(atm)   |                                            |      |
| Alchichica                | AL 5m          | -4.48                  | -1.73               | -2.98                 | -3.01            | 3.2                                        | 9.14 |
|                           | AL 10m         | -4.60                  | -1.77               | -2.94                 | -3.13            | 2.4                                        | 9.22 |
|                           | AL 20m         | -4.56                  | -1.74               | -2.93                 | -3.09            | 2.7                                        | 9.23 |
|                           | AL 30m         | -4.54                  | -1.74               | -2.94                 | -3.07            | 2.8                                        | 9.22 |
|                           | AL 40m         | -4.56                  | -1.74               | -2.92                 | -3.09            | 2.7                                        | 9.24 |
|                           | AL 50m         | -4.47                  | -1.72               | -2.98                 | -3.00            | 3.3                                        | 9.17 |
|                           | AL 55m         | -4.48                  | -1.72               | -2.97                 | -3.01            | 3.2                                        | 9.18 |
|                           | AL 60m         | -4.57                  | -1.74               | -2.92                 | -3.10            | 2.6                                        | 9.25 |
| Atexcac                   | ATX 5m         | -4.30                  | -1.83               | -3.35                 | -2.83            | 4.9                                        | 8.85 |
|                           | ATX 10m        | -4.29                  | -1.83               | -3.36                 | -2.82            | 4.9                                        | 8.85 |
|                           | ATX 16m        | -4.26                  | -1.81               | -3.37                 | -2.79            | 5.3                                        | 8.85 |
|                           | ATX 23m        | -4.25                  | -1.85               | -3.45                 | -2.78            | 5.4                                        | 8.82 |
|                           | ATX 30m        | -4.23                  | -1.82               | -3.43                 | -2.76            | 5.7                                        | 8.82 |
| La Preciosa               | LP 5m          | -4.67                  | -2.04               | -3.40                 | -3.20            | 2.1                                        | 9.02 |
|                           | LP 8m          | -4.65                  | -2.03               | -3.41                 | -3.18            | 2.2                                        | 9.01 |
|                           | LP 10m         | -4.60                  | -2.03               | -3.45                 | -3.13            | 2.4                                        | 8.97 |
|                           | LP 12.5m       | -4.60                  | -2.08               | -3.57                 | -3.13            | 2.4                                        | 8.92 |
|                           | LP 15m         | -4.48                  | -2.01               | -3.55                 | -3.01            | 3.2                                        | 8.88 |
|                           | LP 20m         | -4.48                  | -2.01               | -3.56                 | -3.01            | 3.2                                        | 8.88 |
|                           | LP 31m         | -4.48                  | -2.01               | -3.56                 | -3.01            | 3.2                                        | 8.88 |
| Alberca de<br>Los Espinos | Albesp 5m      | -5.05                  | -2.30               | -3.53                 | -3.58            | 0.9                                        | 9.12 |
|                           | Albesp 7m      | -5.00                  | -2.27               | -3.54                 | -3.53            | 1.0                                        | 9.09 |
|                           | Albesp 10m     | -4.58                  | -2.23               | -3.88                 | -3.11            | 2.6                                        | 8.73 |
|                           | Albesp 17m     | -4.53                  | -2.23               | -3.93                 | -3.06            | 2.9                                        | 8.7  |
|                           | Albesp 20m     | -3.88                  | -2.18               | -4.47                 | -2.41            | 12.7                                       | 8.11 |
|                           | Albesp 25m     | -3.40                  | -2.14               | -4.89                 | -1.93            | 38.7                                       | 7.66 |
| Alchichica                | <b>Surface</b> |                        |                     |                       |                  |                                            |      |
|                           | janv-12        | -4.40                  | -1.74               | -3.08                 | -2.93            | 3.9                                        | 9.08 |
|                           | mai-14         | -4.36                  | -1.72               | -3.08                 | -2.89            | 4.3                                        | 9.02 |
| Atexcac                   | janv-12        | -4.14                  | -1.80               | -3.47                 | -2.67            | 7.0                                        | 8.75 |
|                           | mai-14         | -3.81                  | -1.74               | -3.66                 | -2.34            | 15.2                                       | 8.45 |
| Alberca                   | mai-14         | -4.54                  | -2.23               | -3.91                 | -3.07            | 2.8                                        | 8.67 |
| La Preciosa               | janv-12        | -4.50                  | -2.03               | -3.56                 | -3.03            | 3.1                                        | 8.88 |
|                           | mai-14         | -4.37                  | -2.01               | -3.64                 | -2.90            | 4.1                                        | 8.75 |

197  
 198  
 199

## 200 Table S3

201 Analyses of surficial solid sediments and porewaters: sedimentary organic matter C:N ratio; concentrations and  
 202 isotopic compositions of sedimentary organic carbon (SOC); concentrations and isotopic compositions of DIC in  
 203 the porewaters and solid bulk carbonates.

| Lake                   | Sample name    | Depth | (C:N) <sub>SOM</sub> | SOC   | $\delta^{13}\text{C}_{\text{SOC}}$ | DIC    | $\delta^{13}\text{C}_{\text{DIC}}$ | Carb. | $\delta^{13}\text{C}_{\text{Carb}}$ |
|------------------------|----------------|-------|----------------------|-------|------------------------------------|--------|------------------------------------|-------|-------------------------------------|
|                        |                | cm    | (molar)              | wt. % | ‰                                  | mmol/L | ‰                                  | wt. % | ‰                                   |
| Alchichica             | AL19_C2a_01    | 0-1   | 10.4                 | 5.1   | -25.7                              | 35.8   | 0.4                                | 41    | 4.6                                 |
|                        | AL19_C2a_02    | 1-3   | 10.2                 | 4.7   | -25.7                              | 36.2   | 0.0                                | 44    | 4.5                                 |
|                        | AL19_C2a_03    | 3-5   | 10.6                 | 4.3   | -25.3                              | 36.8   | -0.1                               | ND.   | 4.5                                 |
|                        | AL19_C2a_04    | 5-7   | 10.4                 | 3.8   | -25.1                              | 34.5   | -0.3                               | 40    | 4.7                                 |
|                        | AL19_C2a_05    | 7-10  | 10.4                 | 3.8   | -24.6                              | 34.6   | -0.4                               | 35    | 4.5                                 |
|                        | AL19_C2a_06    | 10-13 | 10.4                 | 3.7   | -24.5                              | 34.9   | -0.5                               | 38    | 4.8                                 |
| Atexcac                | ATX19_C1_1     | 0-1   | 8.2                  | 0.9   | -26.7                              | 24.4   | 0.3                                | 61    | 2.5                                 |
|                        | ATX19_C1_2     | 1-2   | 7.9                  | 1.3   | -26.8                              | 22.5   | -0.2                               | 46    | 2.7                                 |
|                        | ATX19_C1_3     | 2-4   | 8.0                  | 1.1   | -26.8                              | 20.7   | 0.4                                | 61    | 2.7                                 |
|                        | ATX19_C1_S4    | 4-7   | 8.6                  | 0.9   | -27.0                              | ND.    | ND.                                | 71    | 2.5                                 |
|                        | ATX19_C1_4     | 7-9   | 8.7                  | 0.9   | -26.8                              | 22.7   | 0.5                                | ND.   | 2.1                                 |
|                        | ATX19_C1_5     | 9-10  | 9.3                  | 1.0   | -26.9                              | 23.1   | 0.5                                | 64    | 2.1                                 |
|                        | ATX19_C1_S6    | 10-12 | 9.6                  | 0.8   | -27.0                              | 25.7   | 0.0                                | 69    | 2.1                                 |
| La Preciosa            | LP16_C3_7      | 0-2   | 9.8                  | 2.3   | -25.1                              | ND.    | ND.                                | 61    | 2.6                                 |
|                        | LP16_C3_8      | 2-4   | 9.6                  | 2.3   | -25.8                              | ND.    | ND.                                | 63    | 2.6                                 |
|                        | LP16_C3_9      | 8-10  | 11.0                 | 2.6   | -23.2                              | ND.    | ND.                                | 54    | 2.5                                 |
| Alberca de Los Espinos | ALBESP19_C3_1  | 0-1   | 13.1                 | 13.3  | -28.6                              | 11.2   | 9.4                                | 20    | -1.5                                |
|                        | ALBESP19_C3_2  | 1-3   | 12.3                 | 19.0  | -29.4                              | ND.    | ND.                                | 18    | ND.                                 |
|                        | ALBESP19_C3_3  | 3-5   | 11.8                 | 16.2  | -29.2                              | ND.    | ND.                                | 17    | ND.                                 |
|                        | ALBESP19_C3_4  | 5-9   | 11.6                 | 11.9  | -27.9                              | 11.9   | 7.7                                | 15    | -1.5                                |
|                        | ALBESP19_C3_S5 | 9-10  | 14.3                 | 7.5   | -25.7                              | ND.    | ND.                                | 12    | ND.                                 |
|                        | ALBESP19_C3_5  | 10-14 | 13.5                 | 5.5   | -25.4                              | ND.    | ND.                                | 12    | ND.                                 |

204

205

206 Table S4

207 Ionic concentrations in the water columns of the four lakes. TDS stands for ‘total dissolved S’, and was  
 208 measured by ICP-AES. Fe and Mn were measured by ICP-MS. The Cl<sup>-</sup> and SO<sub>4</sub><sup>2-</sup> by chromatography.

209

| Lake                       | Sample      | TDP      | NH <sub>4</sub> <sup>+</sup> | Fe  | Mn  | SO <sub>4</sub> <sup>2-</sup> | TDS   | Cl <sup>-</sup> |
|----------------------------|-------------|----------|------------------------------|-----|-----|-------------------------------|-------|-----------------|
|                            |             | μmoles/L |                              |     |     | mmoles/L                      |       |                 |
| Alchichica                 | AL 4.9m     | 0.3      | 3.1                          | 0.3 | 1.4 | 11.82                         | 10.15 | 107             |
|                            | AL 5m       | 0.4      | 2.9                          | 0.2 | 1.5 | 11.86                         | 10.25 | 107             |
|                            | AL 10m      | 0.4      | 2.4                          | 0.3 | 1.7 | 11.79                         | 10.13 | 106             |
|                            | AL 20m      | 0.5      | 3.5                          | 0.2 | 0.4 | 11.76                         | 10.05 | 106             |
|                            | AL 30m      | 1.6      | 2.9                          | 0.2 | 0.4 | 11.70                         | 10.12 | 106             |
|                            | AL 40m      | 1.8      | 3.5                          | 0.1 | 0.5 | 11.81                         | 9.97  | 107             |
|                            | AL 50m      | 2.5      | 3.3                          | <LD | 0.4 | 12.01                         | 10.02 | 108             |
|                            | AL 55m      | 2.6      | 13.0                         | <LD | 0.5 | 12.03                         | 9.70  | 109             |
|                            | AL 60m      | 3.2      | 3.9                          | 0.1 | 1.0 | 12.24                         | 10.02 | 111             |
| Atexcac                    | ATX 5m      | 0.3      | 2.4                          | 0.8 | 1.0 | 2.51                          | 2.45  | 122             |
|                            | ATX 10m     | 0.2      | 2.4                          | 0.7 | 1.0 | 2.53                          | 2.42  | 122             |
|                            | ATX 16m     | 0.2      | 2.5                          | 0.4 | 1.0 | 2.48                          | 2.45  | 121             |
|                            | ATX 23m     | 0.4      | 2.5                          | 0.2 | 0.0 | 2.64                          | 2.46  | 126             |
|                            | ATX 30m     | 0.5      | 2.9                          | 0.1 | 2.4 | 2.53                          | 2.45  | 124             |
|                            | La Preciosa | LP 5m    | 0.2                          | 1.8 | 0.1 | 1.1                           | 1.22  | 1.20            |
| LP 8m                      |             | 0.2      | 2.0                          | <LD | 0.3 | 1.20                          | 1.21  | 8.2             |
| LP 10m                     |             | 0.2      | 1.6                          | <LD | 0.4 | 1.17                          | 1.19  | 8.0             |
| LP 12.5m                   |             | 0.2      | 1.4                          | <LD | 0.4 | 1.15                          | 1.19  | 7.8             |
| LP 15m                     |             | <LD      | 2.0                          | <LD | 0.6 | 1.16                          | 1.20  | 7.9             |
| LP 20m                     |             | 0.3      | 2.3                          | <LD | 1.4 | 1.16                          | 1.18  | 7.9             |
| LP 30m                     |             | 0.3      | 2.2                          | <LD | 1.0 | 1.16                          | 1.20  | 7.9             |
| Alberca de Los<br>Espinosa | Albosp 5m   | 2.9      | 2.4                          | <LD | 1.5 | 0.01                          | 0.009 | 4.2             |
|                            | Albosp 7m   | 3.0      | 3.1                          | <LD | 0.8 | <LD                           | 0.008 | 4.2             |
|                            | Albosp 10m  | 7.6      | 3.5                          | <LD | 0.5 | <LD                           | 0.006 | 4.0             |
|                            | Albosp 17m  | 11.0     | 2.5                          | <LD | 0.6 | <LD                           | 0.009 | 4.0             |
|                            | Albosp 20m  | 15.6     | 8.5                          | <LD | 1.0 | <LD                           | 0.008 | 4.2             |
|                            | Albosp 25m  | 27.4     | 3.3                          | 0.2 | 1.9 | <LD                           | 0.013 | 4.2             |

210

211

212

213

214

215

216

217

218

219

220 Table S5

221 Iron, sulfur and manganese concentrations in the particulate matter, measured with ICP-AES. <LD =  
222 below detection limits.

| Lake                      | Sample     | Fe                        | S    | Mn   |
|---------------------------|------------|---------------------------|------|------|
|                           |            | 10 <sup>3</sup> *µmoles/L |      |      |
| Alchichica                | AL 4.9m    | 178                       | 3426 | 7    |
|                           | AL 30m     | 61                        | 1224 | 3    |
|                           | AL 35.6m   | 64                        | 1631 | <LD  |
|                           | AL 40.6m   | 47                        | 1630 | 0.2  |
| Atexcac                   | ATX 5m     | 821                       | 1624 | 15   |
|                           | ATX 10m    | 973                       | 2486 | 21   |
|                           | ATX 16m    | 368                       | 1195 | 20   |
| La Preciosa               | LP 5m      | 295                       | 553  | 70   |
|                           | LP 8m      | 236                       | 575  | 52   |
|                           | LP 10m     | 305                       | 525  | 76   |
|                           | LP 12.5m   | 390                       | 661  | 108  |
|                           | LP 15m     | 194                       | 452  | 124  |
| Alberca de<br>Los Espinos | Albesp 5m  | 25                        | 57   | 29   |
|                           | Albesp 7m  | 26                        | 50   | 28   |
|                           | Albesp 10m | 20                        | 68   | 63   |
|                           | Albesp 17m | 24                        | 97   | 1173 |
|                           | Albesp 20m | 230                       | 90   | 996  |
|                           | Albesp 25m | 5974                      | 561  | 156  |

223

225 Isotopic fractionations between the different DIC species according to the temperature at different  
 226 depths in the water columns; calculated based on fractionation equations by Emrich et al., 1970. The  
 227  $\delta^{13}\text{C}_{\text{DIC}}$  of sample 'LP 8m' was not measured, thus the corresponding  $\delta^{13}\text{C}_{\text{CO}_2(\text{aq})}$  and  $\delta^{13}\text{C}_{\text{CO}_3^{2-}(\text{aq})}$  were  
 228 calculated based on the average  $\delta^{13}\text{C}_{\text{DIC}}$  of samples beneath and below.

| Lake                   | Sample     | Temperature<br>°C | $\Delta^{13}\text{C}_{\text{HCO}_3\text{-CO}_2(\text{aq})}$ | $\Delta^{13}\text{C}_{\text{CO}_3\text{-CO}_2(\text{aq})}$ | $\delta^{13}\text{C}_{\text{CO}_2(\text{aq})}$ | $\delta^{13}\text{C}_{\text{CO}_3^{2-}(\text{aq})}$ |
|------------------------|------------|-------------------|-------------------------------------------------------------|------------------------------------------------------------|------------------------------------------------|-----------------------------------------------------|
|                        |            |                   | ‰                                                           |                                                            |                                                |                                                     |
| Alchichica             | AL 5m      | 19.2              | 9.7                                                         | 11.5                                                       | -7.7                                           | 3.5                                                 |
|                        | AL 10m     | 18.9              | 9.7                                                         | 11.6                                                       | -7.8                                           | 3.4                                                 |
|                        | AL 20m     | 16.3              | 10.0                                                        | 12.0                                                       | -8.5                                           | 3.1                                                 |
|                        | AL 30m     | 15.5              | 10.1                                                        | 12.1                                                       | -8.5                                           | 3.2                                                 |
|                        | AL 40m     | 15.3              | 10.1                                                        | 12.1                                                       | -8.7                                           | 3.1                                                 |
|                        | AL 50m     | 15.2              | 10.1                                                        | 12.1                                                       | -8.6                                           | 3.1                                                 |
|                        | AL 55m     | 15.2              | 10.1                                                        | 12.1                                                       | -8.7                                           | 3.1                                                 |
|                        | AL 60m     | 15.2              | 10.1                                                        | 12.1                                                       | -8.7                                           | 3.0                                                 |
| Atexcac                | ATX 5m     | 20.1              | 9.5                                                         | 11.4                                                       | -9.2                                           | 1.9                                                 |
|                        | ATX 10m    | 19.7              | 9.6                                                         | 11.4                                                       | -9.1                                           | 1.9                                                 |
|                        | ATX 16m    | 17.2              | 9.9                                                         | 11.8                                                       | -9.5                                           | 2.0                                                 |
|                        | ATX 23m    | 15.7              | 10.1                                                        | 12.1                                                       | -9.1                                           | 2.6                                                 |
|                        | ATX 30m    | 15.6              | 10.1                                                        | 12.1                                                       | -9.8                                           | 1.9                                                 |
| La Preciosa            | LP 5m      | 19.5              | 9.6                                                         | 11.5                                                       | -9.5                                           | 1.7                                                 |
|                        | LP 8m      | 19.0              | 9.7                                                         | 11.6                                                       | -9.5                                           | 1.8                                                 |
|                        | LP 10m     | 18.3              | 9.8                                                         | 11.7                                                       | -9.5                                           | 1.8                                                 |
|                        | LP 12.5m   | 17.0              | 9.9                                                         | 11.9                                                       | -10.0                                          | 1.6                                                 |
|                        | LP 15m     | 16.2              | 10.0                                                        | 12.0                                                       | -10.3                                          | 1.4                                                 |
|                        | LP 20m     | 15.6              | 10.1                                                        | 12.1                                                       | -10.4                                          | 1.4                                                 |
|                        | LP 31m     | 15.4              | 10.1                                                        | 12.1                                                       | -10.4                                          | 1.4                                                 |
| Alberca de Los Espinos | Albesp 5m  | 22.8              | 9.2                                                         | 11.0                                                       | -11.8                                          | -1.1                                                |
|                        | Albesp 7m  | 22.1              | 9.3                                                         | 11.1                                                       | -11.7                                          | -0.8                                                |
|                        | Albesp 10m | 19.6              | 9.6                                                         | 11.5                                                       | -13.6                                          | -2.3                                                |
|                        | Albesp 17m | 17.4              | 9.9                                                         | 11.8                                                       | -13.1                                          | -1.5                                                |
|                        | Albesp 20m | 16.9              | 9.9                                                         | 11.9                                                       | -12.9                                          | -1.2                                                |
|                        | Albesp 25m | 16.7              | 9.9                                                         | 11.9                                                       | -11.3                                          | 0.5                                                 |



230 Table S7

231 Carbonates mineralogical and isotopic data from the first layer of sediments in the four Mexican lakes.  
232 Bulk carbonate concentrations were determined by acid decarbonation. Relative concentrations of  
233 carbonate phases normalized by the total carbonate content were determined after XRD and Rietveld  
234 refinement analyses. Calculations of C isotope fractionation ( $\Delta^{13}\text{C}_{\text{Carb-CO}_3}$ ) at 16 °C for aragonite and  
235 calcite are based on equations from Romanek et al. (1992) and Emrich et al. (1970) and those for  
236 hydromagnesite on Aharon (1988) (equivalent to Harrison et al., 2021) and Emrich et al. (1970).

237

| Sample name   | Depth | Carb. | $\delta^{13}\text{C}_{\text{Carb}}$ | Relative proportion of each carbonate phase to the total carbonate content (in %) |     |           | $\Delta^{13}\text{C}_{\text{Carb-CO}_3}$ | $\delta^{13}\text{C}_{\text{CO}_3\text{-eq}}$ |
|---------------|-------|-------|-------------------------------------|-----------------------------------------------------------------------------------|-----|-----------|------------------------------------------|-----------------------------------------------|
|               | cm    |       |                                     | wt. %                                                                             | ‰   | Aragonite |                                          |                                               |
| AL19_C2a_01   | 0-1   | 41    | 4.6                                 | 72                                                                                | 4   | 23        | 1.5                                      | 3.1                                           |
| ATX19_C1_1    | 0-1   | 61    | 2.5                                 | 92                                                                                | 8   | 0         | 0.9                                      | 1.7                                           |
| LP16_C3_7     | 0-2   | 61    | 2.6                                 | 96.5                                                                              | 3.5 | 0         | 0.9                                      | 1.7                                           |
| ALBESP19_C3_1 | 0-1   | 20    | -1.6                                | 0                                                                                 | 100 | 0         | -0.8                                     | -0.8                                          |

238

239

240 **References**

- 241 Aharon, P.: A stable-isotope study of magnesites from the Rum jungle uranium field, Australia: implications for  
242 the origin of strata-bound massive magnesites. *Chemical Geology*, 69, 127-145. [https://doi.org/10.1016/0009-2541\(88\)90164-7](https://doi.org/10.1016/0009-2541(88)90164-7) , 1988.
- 244 Atteia, A., van Lis, R., Tielens, A.G. and Martin, W.F.: Anaerobic energy metabolism in unicellular  
245 photosynthetic eukaryotes. *(BBA)-Bioenergetics*, 1827, 210-223. <https://doi.org/10.1016/j.bbabi.2012.08.002> ,  
246 2013.
- 247 Bade, D.L., Carpenter, S.R., Cole, J.J., Hanson, P.C., Hesslein, R.H.: Controls of  $\delta^{13}\text{C}$ -DIC in lakes:  
248 Geochemistry, lake metabolism, and morphometry. *Limnol. Oceanogr.* 49, 1160–1172.  
249 <https://doi.org/10.4319/lo.2004.49.4.1160> , 2004.
- 250 Emrich, K., Ehhalt, D.H., Vogel, J.C.: Carbon isotope fractionation during the precipitation of calcium  
251 carbonate. *Earth Planet. Sci. Lett.* 8, 363–371. [https://doi.org/10.1016/0012-821X\(70\)90109-3](https://doi.org/10.1016/0012-821X(70)90109-3) , 1970.
- 252 Fulton, J.M., Arthur, M.A., Thomas, B., Freeman, K.H.: Pigment carbon and nitrogen isotopic signatures in  
253 euxinic basins. *Geobiology* 16, 429–445. <https://doi.org/10.1111/gbi.12285> , 2018.
- 254 Hamilton, T.L.: The trouble with oxygen: The ecophysiology of extant phototrophs and implications for the  
255 evolution of oxygenic photosynthesis. *Free Radical Biology and Medicine*, 140, 233-249.  
256 <https://doi.org/10.1016/j.freeradbiomed.2019.05.003> , 2019.
- 257 Harrison, A.L. Bénézeth, P., Schott, J., Oelkers, E.H., Mavromatis, V.: Magnesium and carbon isotope  
258 fractionation during hydrated Mg-carbonate mineral phase transformations, *Geochimica et Cosmochimica Acta*,  
259 293, 507-524. <https://doi.org/10.1016/j.gca.2020.10.028> , 2021,
- 260 Macek, M., Medina, X.S., Picazo, A., Peštová, D., Reyes, F.B., Hernández, J.R.M., Alcocer, J., Ibarra, M.M.,  
261 Camacho, A.: Spirostomum teres: A Long Term Study of an Anoxic-Hypolimnion Population Feeding upon  
262 Photosynthesizing Microorganisms. *Acta Protozool.* 59, 13–38.  
263 <https://doi.org/10.4467/16890027AP.20.002.12158> , 2020.
- 264 Mook, W.G., Bommerson, J.C., Staverman, W.H.: Carbon isotope fractionation between dissolved bicarbonate  
265 and gaseous carbon dioxide. *Earth Planet. Sci. Lett.* 22, 169–176. [https://doi.org/10.1016/0012-821X\(74\)90078-8](https://doi.org/10.1016/0012-821X(74)90078-8) ,  
266 1974.
- 267 Romanek, C.S., Grossman, E.L., Morse J.W.: Carbon isotopic fractionation in synthetic aragonite and calcite:  
268 Effects of temperature and precipitation rate. *Geochimica et Cosmochimica Acta*, 56, 419-430,  
269 [https://doi.org/10.1016/0016-7037\(92\)90142-6](https://doi.org/10.1016/0016-7037(92)90142-6) , 1992.
- 270 Sharp, Z.: Principles of stable isotope geochemistry. <https://doi.org/10.25844/h9q1-0p82> , 2017.
- 271 Taniguchi, M. and Lindsey, J.S.: Absorption and fluorescence spectral database of chlorophylls and analogues.  
272 *Photochemistry and Photobiology*, 97, 136-165. <https://doi.org/10.1111/php.13319> , 2021.
- 273
